# Supplementary material
Source: Research Square preprint supplement (doi:10.21203/rs.3.rs-8987001/v1)
Supplement: Supplementary file 1 [file 8c7876a3df7d9e21169520e0.pdf]

## Supporting Information

for

### Dual Tuning of Second-Harmonic Generation and Rashba Spin Splitting in Chiral Hybrid Lead Halide Perovskites via Halogen Site Engineering

Qian Xu,<sup>1,3,4†</sup> Xuli Cheng,<sup>2,7,8†</sup> Xiyue Cheng,<sup>1,4,\*</sup> Lorenzo Malavasi,<sup>5</sup> Marta Morana,<sup>6</sup> Juan J. Aucar,<sup>9,10</sup> Muskan Nabi,<sup>7</sup> Gustavo A. Aucar,<sup>9,10</sup> Shuiquan Deng,<sup>1,4</sup> Lingyan Feng,<sup>2</sup> Wei Ren,<sup>2,\*</sup> and Alessandro Stroppa<sup>7,\*</sup>

<sup>1</sup> State Key Laboratory of Functional Crystals and Devices, Fujian Institute of Research on the Structure of Matter (FJIRSM), Chinese Academy of Sciences (CAS), Fuzhou, 350108, China

<sup>2</sup> Material Genome Institute, Physics Department, State Key Laboratory of Advanced Special Steels, School of Materials Science and Engineering, Shanghai Engineering Research Center for Integrated Circuits and Advance Display Materials, Institute for Quantum Science and Technology, International Center for Quantum and Molecular Structures, Shanghai University, Shanghai 200444, China

<sup>3</sup> College of Physics and Energy, Fujian Normal University, Fuzhou, 350117, China

<sup>4</sup> Fujian College, University of Chinese Academy of Sciences, Beijing, 100049, China

<sup>5</sup> Department of Chemistry and INSTM, University of Pavia, Viale Taramelli 16 27100 Pavia, Italy

<sup>6</sup> Dipartimento di Scienze della Terra, University di Firenze, Via La Pira, 4, 50121 Florence, Italy

<sup>7</sup> CNR-SPIN, c/o Dip.to di Scienze Fisiche e Chimiche - Via Vetoio - 67100 - Coppito (AQ), Italy

<sup>8</sup> Department of Materials Science and Metallurgy, University of Cambridge, 27 Charles Babbage Road, Cambridge CB3 0FS, United Kingdom

<sup>9</sup> Physics Department, Natural and Exact Science Faculty; National Northeastern University of Argentina, Avda Libertad 5460, W3404AAS, Corrientes, Argentina

<sup>10</sup> Institute for Modelling and Innovative Technology, IMIT (CONICET-UNNE), Avda Libertad 5460, W3404AAS, Corrientes, Argentina

† These authors contributed equally to this work.

#### Corresponding Author

\* Xiyue Cheng (xycheng@fjirsm.ac.cn)

\* Wei Ren (renwei@shu.edu.cn)

\* Alessandro Stroppa (alessandro.stroppa@spin.cnr.it)

## **CONTENTS**

|                            |           |
|----------------------------|-----------|
| <b>Tables S1-S10 .....</b> | <b>3</b>  |
| <b>Figures S1-S9 .....</b> | <b>16</b> |
| <b>References .....</b>    | <b>25</b> |

## Tables S1-S10

**Table S1.** Calculated values of  $E_g^{\text{PBE}}$ ,  $E_g^{\text{SOC}}$ ,  $E_g^{\text{HSE}}$ , static SHG tensor  $d_{ij}$ , effective powder SHG response  $d_{eff}^p$  at static limit and 1064 nm, and birefringence at 1064 nm for theoretical (R)-o-BrMBAPbI<sub>3</sub>-theory.

| Material                                   | $E_g^{\text{PBE}}$<br>(eV) | $E_g^{\text{SOC}}$<br>(eV) | $E_g^{\text{HSE}}$<br>(eV) | $d_{ij}$ (pm/V)                                                             |                                                                              | $d_{eff}^p$ (pm/V)<br>static limit<br>( $\omega \rightarrow 0$ ) | $d_{eff}^p$ (pm/V)<br>at 1064 nm                | $\Delta n$ at<br>1064<br>nm |
|--------------------------------------------|----------------------------|----------------------------|----------------------------|-----------------------------------------------------------------------------|------------------------------------------------------------------------------|------------------------------------------------------------------|-------------------------------------------------|-----------------------------|
| (R)-o-<br>BrMBAPbI <sub>3</sub><br>-theory | 2.85                       | 2.42                       | 3.64                       | $d_{14} = -0.19$<br>$d_{21} = -0.90$<br>$d_{23} = -0.45$<br>$d_{34} = 0.15$ | $d_{16} = -0.29$<br>$d_{22} = -2.34$<br>$d_{25} = -0.14$<br>$d_{36} = -0.20$ | 1.205<br>( $3.65 \times d_{eff}^{\text{KDP}}$ )                  | 2.682<br>( $8.13 \times d_{eff}^{\text{KDP}}$ ) | 0.112                       |

**Table S2.** Bond length values after structure optimization for (S)-o-BrMBAPbI<sub>3</sub>, as well as the experimental values from this work.

| Bonds  | (S)-o-BrMBAPbI <sub>3</sub><br>Bond lengths (Å) |         |        |
|--------|-------------------------------------------------|---------|--------|
|        | Experimental                                    | PBE-GGA | DFT-D3 |
| Pb1-I1 | 3.287                                           | 3.273   | 3.289  |
| Pb1-I2 | 3.169                                           | 3.201   | 3.198  |
| Pb1-I3 | 3.481                                           | 3.404   | 3.404  |
| Pb1-I4 | 3.051                                           | 3.121   | 3.123  |
| Pb1-I5 | 3.275                                           | 3.292   | 3.292  |
| Pb1-I6 | 3.192                                           | 3.217   | 3.228  |
| Avg.   | 3.242                                           | 3.251   | 3.256  |
| C-C    | 1.421                                           | 1.427   | 1.427  |
| C-Br   | 1.929                                           | 1.916   | 1.919  |
| N-C    | 1.512                                           | 1.524   | 1.524  |
| N-H    | 0.891                                           | 1.038   | 1.037  |

**Table S3.** Bond length values after structure optimization for (S)-m-BrMBA<sub>2</sub>PbI<sub>4</sub>, as well as the experimental values obtained from reference<sup>1</sup>.

| Bonds  | (S)-m-BrMBA <sub>2</sub> PbI <sub>4</sub><br>Bond lengths (Å) |         |        |
|--------|---------------------------------------------------------------|---------|--------|
|        | Experimental <sup>1</sup>                                     | PBE-GGA | DFT-D3 |
| Pb1-I1 | 3.183                                                         | 3.214   | 3.216  |
| Pb1-I2 | 3.182                                                         | 3.181   | 3.188  |
| Pb1-I3 | 3.176                                                         | 3.192   | 3.200  |
| Pb1-I4 | 3.208                                                         | 3.242   | 3.236  |
| Pb1-I5 | 3.308                                                         | 3.323   | 3.326  |
| Pb1-I6 | 3.149                                                         | 3.169   | 3.160  |
| Avg.   | 3.201                                                         | 3.220   | 3.221  |
| C-C    | 1.419                                                         | 1.426   | 1.426  |
| C-Br   | 1.902                                                         | 1.907   | 1.910  |
| N-C    | 1.511                                                         | 1.512   | 1.511  |
| N-H    | 0.910                                                         | 1.043   | 1.043  |

**Table S4.** Bond length values after structure optimization for (S)-p-BrMBA<sub>2</sub>PbI<sub>4</sub>, as well as the experimental values from this work.

| Bonds  | (S)-p-BrMBA <sub>2</sub> PbI <sub>4</sub><br>Bond lengths (Å) |         |        |
|--------|---------------------------------------------------------------|---------|--------|
|        | Experimental                                                  | PBE-GGA | DFT-D3 |
| Pb1-I1 | 3.172                                                         | 3.210   | 3.205  |
| Pb1-I2 | 3.291                                                         | 3.321   | 3.309  |
| Pb1-I3 | 3.176                                                         | 3.203   | 3.205  |
| Pb1-I4 | 3.278                                                         | 3.264   | 3.284  |
| Pb1-I5 | 3.243                                                         | 3.258   | 3.268  |
| Pb1-I6 | 3.300                                                         | 3.304   | 3.309  |
| Pb2-I1 | 3.189                                                         | 3.200   | 3.195  |
| Pb2-I2 | 3.122                                                         | 3.190   | 3.189  |
| Pb2-I3 | 3.214                                                         | 3.246   | 3.251  |
| Pb2-I4 | 3.399                                                         | 3.349   | 3.367  |
| Pb2-I5 | 3.235                                                         | 3.229   | 3.239  |
| Pb2-I6 | 3.336                                                         | 3.357   | 3.363  |
| Avg.   | 3.246                                                         | 3.261   | 3.265  |
| C-C    | 1.423                                                         | 1.426   | 1.427  |
| C-Br   | 1.948                                                         | 1.908   | 1.910  |
| N-C    | 1.544                                                         | 1.516   | 1.516  |
| N-H    | 0.891                                                         | 1.042   | 1.042  |

**Table S5.** Optimized crystal structure data for (S)-o-BrMBAPbI<sub>3</sub>.

| Lattice parameters                                                               |        |        |        | Space group   |           |
|----------------------------------------------------------------------------------|--------|--------|--------|---------------|-----------|
| $a=8.680\text{\AA}$ $b=8.058\text{\AA}$ $c=11.561\text{\AA}$ $\beta=99.83^\circ$ |        |        |        | $P2_1$        |           |
| Atoms                                                                            | $x$    | $y$    | $z$    | Wyckoff sites | Occupancy |
| Pb                                                                               | 0.4937 | 0.5960 | 0.4930 | $2a$          | 1.000     |
| I1                                                                               | 0.5197 | 0.3668 | 0.7213 | $2a$          | 1.000     |
| I2                                                                               | 0.7834 | 0.8061 | 0.6049 | $2a$          | 1.000     |
| I3                                                                               | 0.7370 | 0.3523 | 0.3950 | $2a$          | 1.000     |
| C1                                                                               | 0.1553 | 0.3522 | 0.8810 | $2a$          | 1.000     |
| C2                                                                               | 0.0288 | 0.3672 | 0.7736 | $2a$          | 1.000     |
| C3                                                                               | 0.2269 | 0.1989 | 0.9129 | $2a$          | 1.000     |
| C4                                                                               | 0.2041 | 0.4883 | 0.9541 | $2a$          | 1.000     |
| C5                                                                               | 0.3174 | 0.4738 | 0.0548 | $2a$          | 1.000     |
| C6                                                                               | 0.3849 | 0.3189 | 0.0847 | $2a$          | 1.000     |
| C7                                                                               | 0.3398 | 0.1817 | 0.0134 | $2a$          | 1.000     |
| C8                                                                               | 0.9576 | 0.2044 | 0.7249 | $2a$          | 1.000     |
| Br                                                                               | 0.1148 | 0.7034 | 0.9166 | $2a$          | 1.000     |
| N                                                                                | 0.0935 | 0.4554 | 0.6756 | $2a$          | 1.000     |
| H1                                                                               | 0.9359 | 0.4501 | 0.7935 | $2a$          | 1.000     |
| H2                                                                               | 0.0136 | 0.4522 | 0.5982 | $2a$          | 1.000     |
| H3                                                                               | 0.1967 | 0.4003 | 0.6606 | $2a$          | 1.000     |
| H4                                                                               | 0.1189 | 0.5790 | 0.6956 | $2a$          | 1.000     |
| H5                                                                               | 0.1936 | 0.0906 | 0.8580 | $2a$          | 1.000     |
| H6                                                                               | 0.3527 | 0.5823 | 0.1093 | $2a$          | 1.000     |
| H7                                                                               | 0.4723 | 0.3066 | 0.1641 | $2a$          | 1.000     |
| H8                                                                               | 0.3920 | 0.0606 | 0.0365 | $2a$          | 1.000     |
| H9                                                                               | 0.0433 | 0.1232 | 0.6933 | $2a$          | 1.000     |
| H10                                                                              | 0.8625 | 0.2285 | 0.6513 | $2a$          | 1.000     |
| H11                                                                              | 0.9081 | 0.1379 | 0.7927 | $2a$          | 1.000     |

**Table S6.** Optimized crystal structure data for (S)-m-BrMBA<sub>2</sub>PbI<sub>4</sub>.

| Lattice parameters                                                               |        |        |        | Space group   |           |
|----------------------------------------------------------------------------------|--------|--------|--------|---------------|-----------|
| $a=9.155\text{\AA}$ $b=8.225\text{\AA}$ $c=17.778\text{\AA}$ $\beta=99.05^\circ$ |        |        |        | $P2_1$        |           |
| Atoms                                                                            | $x$    | $y$    | $z$    | Wyckoff sites | Occupancy |
| Pb                                                                               | 0.7515 | 0.7335 | 0.0013 | $2a$          | 1.000     |
| I1                                                                               | 0.8388 | 0.6762 | 0.1817 | $2a$          | 1.000     |
| I2                                                                               | 0.5488 | 0.4165 | 0.9897 | $2a$          | 1.000     |
| I3                                                                               | 0.6725 | 0.7213 | 0.8196 | $2a$          | 1.000     |
| I4                                                                               | 0.9227 | 0.0787 | 0.0215 | $2a$          | 1.000     |
| C1                                                                               | 0.2718 | 0.6834 | 0.2073 | $2a$          | 1.000     |
| C2                                                                               | 0.2357 | 0.7081 | 0.2868 | $2a$          | 1.000     |
| C3                                                                               | 0.1679 | 0.7419 | 0.4350 | $2a$          | 1.000     |
| C4                                                                               | 0.2054 | 0.5703 | 0.3280 | $2a$          | 1.000     |
| C5                                                                               | 0.1723 | 0.5894 | 0.4013 | $2a$          | 1.000     |
| C6                                                                               | 0.2000 | 0.8783 | 0.3937 | $2a$          | 1.000     |
| C7                                                                               | 0.2350 | 0.8619 | 0.3204 | $2a$          | 1.000     |
| C8                                                                               | 0.4366 | 0.6870 | 0.2037 | $2a$          | 1.000     |
| C9                                                                               | 0.2174 | 0.6511 | 0.7629 | $2a$          | 1.000     |
| C10                                                                              | 0.2955 | 0.6994 | 0.6974 | $2a$          | 1.000     |
| C11                                                                              | 0.2934 | 0.8618 | 0.6733 | $2a$          | 1.000     |
| C12                                                                              | 0.3718 | 0.9053 | 0.6154 | $2a$          | 1.000     |
| C13                                                                              | 0.4511 | 0.7916 | 0.5799 | $2a$          | 1.000     |
| C14                                                                              | 0.4484 | 0.6294 | 0.6026 | $2a$          | 1.000     |
| C15                                                                              | 0.3714 | 0.5832 | 0.6610 | $2a$          | 1.000     |
| C16                                                                              | 0.0515 | 0.6808 | 0.7479 | $2a$          | 1.000     |
| Br1                                                                              | 0.1314 | 0.4012 | 0.4574 | $2a$          | 1.000     |
| Br2                                                                              | 0.3647 | 0.1266 | 0.5825 | $2a$          | 1.000     |
| N1                                                                               | 0.1931 | 0.8080 | 0.1533 | $2a$          | 1.000     |
| N2                                                                               | 0.2838 | 0.7432 | 0.8339 | $2a$          | 1.000     |

**Table S6.** The optimized crystal structure data for (S)-m-BrMBA<sub>2</sub>PbI<sub>4</sub> (continued).

| Atoms | x      | y      | z      | Wyckoff sites | Occupancy |
|-------|--------|--------|--------|---------------|-----------|
| H1    | 0.2257 | 0.5659 | 0.1857 | 2a            | 1.000     |
| H2    | 0.0801 | 0.8048 | 0.1564 | 2a            | 1.000     |
| H3    | 0.2043 | 0.7791 | 0.0977 | 2a            | 1.000     |
| H4    | 0.2337 | 0.9260 | 0.1641 | 2a            | 1.000     |
| H5    | 0.1412 | 0.7543 | 0.4922 | 2a            | 1.000     |
| H6    | 0.2080 | 0.4499 | 0.3025 | 2a            | 1.000     |
| H7    | 0.1982 | 0.9984 | 0.4196 | 2a            | 1.000     |
| H8    | 0.2612 | 0.9706 | 0.2898 | 2a            | 1.000     |
| H9    | 0.4582 | 0.6595 | 0.1460 | 2a            | 1.000     |
| H10   | 0.4923 | 0.5952 | 0.2427 | 2a            | 1.000     |
| H11   | 0.4847 | 0.8064 | 0.2206 | 2a            | 1.000     |
| H12   | 0.2564 | 0.8663 | 0.8303 | 2a            | 1.000     |
| H13   | 0.3991 | 0.7343 | 0.8429 | 2a            | 1.000     |
| H14   | 0.2443 | 0.6979 | 0.8816 | 2a            | 1.000     |
| H15   | 0.2397 | 0.5221 | 0.7766 | 2a            | 1.000     |
| H16   | 0.2328 | 0.9544 | 0.6998 | 2a            | 1.000     |
| H17   | 0.5128 | 0.8280 | 0.5352 | 2a            | 1.000     |
| H18   | 0.5086 | 0.5391 | 0.5748 | 2a            | 1.000     |
| H19   | 0.3713 | 0.4563 | 0.6789 | 2a            | 1.000     |
| H20   | 0.0266 | 0.8097 | 0.7359 | 2a            | 1.000     |
| H21   | 0.9999 | 0.6450 | 0.7971 | 2a            | 1.000     |
| H22   | 0.0020 | 0.6091 | 0.6985 | 2a            | 1.000     |

**Table S7.** Optimized crystal structure data for (S)-p-BrMBA<sub>2</sub>PbI<sub>4</sub>.

| Lattice parameters                                                                 |        |        |        | Space group   |           |
|------------------------------------------------------------------------------------|--------|--------|--------|---------------|-----------|
| $a=12.722\text{\AA}$ $b=12.768\text{\AA}$ $c=32.749\text{\AA}$ $\beta=93.92^\circ$ |        |        |        | C2            |           |
| Atoms                                                                              | x      | y      | z      | Wyckoff sites | Occupancy |
| Pb1                                                                                | 0.7452 | 0.1606 | 0.9987 | 4c            | 1.000     |
| Pb2                                                                                | 0.7526 | 0.9734 | 0.4988 | 4c            | 1.000     |
| I1                                                                                 | 0.7837 | 0.9576 | 0.5979 | 4c            | 1.000     |
| I2                                                                                 | 0.6916 | 0.2298 | 0.5006 | 4c            | 1.000     |
| I3                                                                                 | 0.1859 | 0.9107 | 0.0014 | 4c            | 1.000     |
| I4                                                                                 | 0.7637 | 0.9778 | 0.4016 | 4c            | 1.000     |
| I5                                                                                 | 0.7518 | 0.1675 | 0.9010 | 4c            | 1.000     |
| I6                                                                                 | 0.7698 | 0.1344 | 0.0962 | 4c            | 1.000     |
| I7                                                                                 | 0.5000 | 0.0853 | 0.0000 | 2a            | 1.000     |
| I8                                                                                 | 0.5000 | 0.7136 | 0.0000 | 2a            | 1.000     |
| I9                                                                                 | 0.5000 | 0.5340 | 0.5000 | 2b            | 1.000     |
| I10                                                                                | 0.5000 | 0.8963 | 0.5000 | 2b            | 1.000     |
| C1                                                                                 | 0.5140 | 0.2090 | 0.6515 | 4c            | 1.000     |
| C2                                                                                 | 0.8723 | 0.0048 | 0.7892 | 4c            | 1.000     |
| C3                                                                                 | 0.4454 | 0.2379 | 0.6813 | 4c            | 1.000     |
| C4                                                                                 | 0.6163 | 0.1762 | 0.6643 | 4c            | 1.000     |
| C5                                                                                 | 0.5784 | 0.1979 | 0.7347 | 4c            | 1.000     |
| C6                                                                                 | 0.6488 | 0.1704 | 0.7057 | 4c            | 1.000     |
| C7                                                                                 | 0.0778 | 0.9517 | 0.8173 | 4c            | 1.000     |
| C8                                                                                 | 0.9523 | 0.9995 | 0.7622 | 4c            | 1.000     |
| C9                                                                                 | 0.0553 | 0.9735 | 0.7758 | 4c            | 1.000     |
| C10                                                                                | 0.4763 | 0.2080 | 0.6067 | 4c            | 1.000     |
| C11                                                                                | 0.5212 | 0.4190 | 0.8887 | 4c            | 1.000     |
| C12                                                                                | 0.5133 | 0.1137 | 0.5833 | 4c            | 1.000     |
| C13                                                                                | 0.4632 | 0.3195 | 0.8991 | 4c            | 1.000     |
| C14                                                                                | 0.8958 | 0.9807 | 0.8303 | 4c            | 1.000     |
| C15                                                                                | 0.4983 | 0.4535 | 0.8448 | 4c            | 1.000     |
| C16                                                                                | 0.4769 | 0.2329 | 0.7230 | 4c            | 1.000     |
| C17                                                                                | 0.3863 | 0.8717 | 0.2777 | 4c            | 1.000     |
| C18                                                                                | 0.6323 | 0.0196 | 0.2173 | 4c            | 1.000     |
| C19                                                                                | 0.6415 | 0.9215 | 0.2359 | 4c            | 1.000     |
| C20                                                                                | 0.3443 | 0.7792 | 0.2608 | 4c            | 1.000     |

**Table S7.** The optimized crystal structure data for (S)-p-BrMBA<sub>2</sub>PbI<sub>4</sub> (continued).

| Atoms | x      | y      | z      | Wyckoff sites | Occupancy |
|-------|--------|--------|--------|---------------|-----------|
| C21   | 0.6140 | 0.8302 | 0.2143 | 4c            | 1.000     |
| C22   | 0.3351 | 0.6896 | 0.2846 | 4c            | 1.000     |
| C23   | 0.4155 | 0.7828 | 0.3433 | 4c            | 1.000     |
| C24   | 0.3715 | 0.6917 | 0.3257 | 4c            | 1.000     |
| C25   | 0.5252 | 0.9469 | 0.1097 | 4c            | 1.000     |
| C26   | 0.5768 | 0.8381 | 0.1733 | 4c            | 1.000     |
| C27   | 0.4633 | 0.7829 | 0.3869 | 4c            | 1.000     |
| C28   | 0.5674 | 0.9359 | 0.1538 | 4c            | 1.000     |
| C29   | 0.4212 | 0.8728 | 0.3191 | 4c            | 1.000     |
| C30   | 0.5957 | 0.0260 | 0.1763 | 4c            | 1.000     |
| C31   | 0.5646 | 0.7194 | 0.3924 | 4c            | 1.000     |
| C32   | 0.4228 | 0.8888 | 0.0992 | 4c            | 1.000     |
| Br1   | 0.6927 | 0.9149 | 0.2920 | 4c            | 1.000     |
| Br2   | 0.3011 | 0.7715 | 0.2039 | 4c            | 1.000     |
| Br3   | 0.6234 | 0.1852 | 0.7913 | 4c            | 1.000     |
| Br4   | 0.9172 | 0.0231 | 0.7053 | 4c            | 1.000     |
| N1    | 0.4948 | 0.5057 | 0.9178 | 4c            | 1.000     |
| N2    | 0.5083 | 0.3079 | 0.5854 | 4c            | 1.000     |
| N3    | 0.3856 | 0.7419 | 0.4159 | 4c            | 1.000     |
| N4    | 0.6077 | 0.9112 | 0.0814 | 4c            | 1.000     |
| H1    | 0.7921 | 0.0252 | 0.7784 | 4c            | 1.000     |
| H2    | 0.3656 | 0.2642 | 0.6720 | 4c            | 1.000     |
| H3    | 0.6716 | 0.1523 | 0.6420 | 4c            | 1.000     |
| H4    | 0.7281 | 0.1436 | 0.7150 | 4c            | 1.000     |
| H5    | 0.1582 | 0.9311 | 0.8280 | 4c            | 1.000     |
| H6    | 0.1168 | 0.9680 | 0.7544 | 4c            | 1.000     |
| H7    | 0.3897 | 0.2104 | 0.6041 | 4c            | 1.000     |
| H8    | 0.5513 | 0.5650 | 0.9163 | 4c            | 1.000     |
| H9    | 0.4987 | 0.4787 | 0.9476 | 4c            | 1.000     |
| H10   | 0.9204 | 0.0383 | 0.9114 | 4c            | 1.000     |
| H11   | 0.1065 | 0.9073 | 0.8946 | 4c            | 1.000     |
| H12   | 0.4816 | 0.1160 | 0.5513 | 4c            | 1.000     |

**Table S7.** The optimized crystal structure data for (S)-p-BrMBA<sub>2</sub>PbI<sub>4</sub> (continued).

| Atoms | x      | y      | z      | Wyckoff sites | Occupancy |
|-------|--------|--------|--------|---------------|-----------|
| H13   | 0.4833 | 0.0426 | 0.5972 | 4c            | 1.000     |
| H14   | 0.5994 | 0.1085 | 0.5837 | 4c            | 1.000     |
| H15   | 0.5001 | 0.2982 | 0.5540 | 4c            | 1.000     |
| H16   | 0.5852 | 0.3322 | 0.5931 | 4c            | 1.000     |
| H17   | 0.4572 | 0.3688 | 0.5922 | 4c            | 1.000     |
| H18   | 0.4842 | 0.2945 | 0.9307 | 4c            | 1.000     |
| H19   | 0.4858 | 0.2568 | 0.8786 | 4c            | 1.000     |
| H20   | 0.3774 | 0.3293 | 0.8953 | 4c            | 1.000     |
| H21   | 0.8318 | 0.9826 | 0.8508 | 4c            | 1.000     |
| H22   | 0.4230 | 0.2562 | 0.7458 | 4c            | 1.000     |
| H23   | 0.3931 | 0.9415 | 0.2590 | 4c            | 1.000     |
| H24   | 0.6527 | 0.0904 | 0.2344 | 4c            | 1.000     |
| H25   | 0.6207 | 0.7539 | 0.2291 | 4c            | 1.000     |
| H26   | 0.8021 | 0.1177 | 0.2713 | 4c            | 1.000     |
| H27   | 0.8656 | 0.1198 | 0.3435 | 4c            | 1.000     |
| H28   | 0.5145 | 0.0305 | 0.1026 | 4c            | 1.000     |
| H29   | 0.5547 | 0.7664 | 0.1568 | 4c            | 1.000     |
| H30   | 0.4782 | 0.8640 | 0.3969 | 4c            | 1.000     |
| H31   | 0.4542 | 0.9450 | 0.3323 | 4c            | 1.000     |
| H32   | 0.5890 | 0.1026 | 0.1617 | 4c            | 1.000     |
| H33   | 0.3624 | 0.6647 | 0.4102 | 4c            | 1.000     |
| H34   | 0.3189 | 0.7901 | 0.4142 | 4c            | 1.000     |
| H35   | 0.4182 | 0.7466 | 0.4458 | 4c            | 1.000     |
| H36   | 0.5508 | 0.6368 | 0.3844 | 4c            | 1.000     |
| H37   | 0.5990 | 0.7237 | 0.4241 | 4c            | 1.000     |
| H38   | 0.6221 | 0.7510 | 0.3722 | 4c            | 1.000     |
| H39   | 0.4312 | 0.8041 | 0.1038 | 4c            | 1.000     |
| H40   | 0.3938 | 0.9028 | 0.0673 | 4c            | 1.000     |
| H41   | 0.3630 | 0.9171 | 0.1191 | 4c            | 1.000     |
| H42   | 0.6364 | 0.8360 | 0.0881 | 4c            | 1.000     |
| H43   | 0.5774 | 0.9125 | 0.0513 | 4c            | 1.000     |
| H44   | 0.3289 | 0.9636 | 0.9163 | 4c            | 1.000     |

**Table S8.** Contributions of individual atoms to the largest SHG component in (S)-o-BrMBAPbl<sub>3</sub>, (S)-m-BrMBA<sub>2</sub>Pbl<sub>4</sub>, and (S)-p-BrMBA<sub>2</sub>Pbl<sub>4</sub>.  $A_\tau$  is the contribution (in %) from a single atom  $\tau$ , and  $C_A$  that from all atoms of the same type.  $^{VB}A_\tau$  is the contribution (in %) of the VBs, and  $^{CB}A_\tau$  from the CBs. The contributions from the  $s$ ,  $p$ , and  $d$  states of the atom  $\tau$  to of  $^{VB}A_\tau$  and  $^{CB}A_\tau$  are also shown.  $W_A$  refers to the number of the same type of atoms in a unit cell.

| Material                                                  | Atom | $W_A$ | $A_\tau$ | $C_A$ | $^{VB}A_\tau$ | $^{CB}A_\tau$ | $^{VB}_sA_\tau$ | $^{VB}_pA_\tau$ | $^{VB}_dA_\tau$ | $^{CB}_sA_\tau$ | $^{CB}_pA_\tau$ | $^{CB}_dA_\tau$ |
|-----------------------------------------------------------|------|-------|----------|-------|---------------|---------------|-----------------|-----------------|-----------------|-----------------|-----------------|-----------------|
| (S)-o-<br>BrMBAPbl <sub>3</sub><br>$d_{22}$               | Pb   | 2     | 7.90     | 15.80 | 3.78          | 4.12          | 1.87            | 0.61            | 1.30            | 0.10            | 3.59            | 0.43            |
|                                                           | I    | 6     | 8.67     | 52.04 | 6.66          | 2.01          | -0.75           | 7.41            | 0.00            | 0.15            | 0.69            | 1.18            |
|                                                           | C    | 16    | 1.10     | 17.59 | 0.32          | 0.78          | -0.05           | 0.37            | 0.00            | 0.09            | 0.68            | 0.00            |
|                                                           | Br   | 2     | 2.67     | 5.34  | 2.24          | 0.43          | -0.22           | 2.47            | -0.01           | -0.08           | -0.19           | 0.70            |
|                                                           | N    | 2     | 3.15     | 6.29  | 2.80          | 0.34          | -0.02           | 2.82            | 0.00            | -0.03           | 0.38            | 0.00            |
|                                                           | H    | 22    | 0.13     | 2.94  | -0.03         | 0.17          | -0.04           | 0.01            | 0.00            | 0.09            | 0.07            | 0.00            |
| (S)-m-<br>BrMBA <sub>2</sub> Pbl <sub>4</sub><br>$d_{22}$ | Pb   | 2     | 6.85     | 13.69 | 0.77          | 6.08          | -2.42           | -0.40           | 3.59            | 0.16            | 5.59            | 0.34            |
|                                                           | I    | 8     | 0.49     | 3.96  | -2.04         | 2.53          | -1.13           | -0.90           | 0.00            | 0.23            | 1.38            | 0.93            |
|                                                           | C    | 32    | 1.26     | 40.20 | 0.47          | 0.79          | -0.05           | 0.52            | 0.00            | 0.20            | 0.60            | 0.00            |
|                                                           | Br   | 4     | 4.65     | 18.58 | 1.32          | 3.32          | -0.12           | 1.45            | 0.00            | 0.24            | 1.91            | 1.17            |
|                                                           | N    | 4     | 2.83     | 11.31 | 1.82          | 1.01          | -0.02           | 1.84            | 0.00            | 0.59            | 0.43            | 0.00            |
|                                                           | H    | 44    | 0.28     | 12.24 | 0.12          | 0.16          | 0.11            | 0.01            | 0.00            | 0.09            | 0.07            | 0.00            |
| (S)-p-<br>BrMBA <sub>2</sub> Pbl <sub>4</sub><br>$d_{16}$ | Pb   | 4     | 2.85     | 11.39 | 6.86          | -4.01         | 6.57            | -0.28           | 0.57            | -0.10           | -3.93           | 0.02            |
|                                                           | I    | 16    | 3.76     | 60.13 | 3.57          | 0.18          | -0.39           | 3.97            | 0.00            | -0.16           | 0.22            | 0.12            |
|                                                           | C    | 64    | 0.33     | 21.22 | -0.17         | 0.51          | -0.03           | -0.14           | 0.00            | 0.11            | 0.40            | 0.00            |
|                                                           | Br   | 8     | 1.92     | 15.38 | -0.89         | 2.81          | -0.03           | -0.85           | 0.00            | 0.25            | 1.86            | 0.70            |
|                                                           | N    | 8     | -0.73    | -5.86 | -1.03         | 0.29          | -0.02           | -1.01           | 0.00            | 0.02            | 0.27            | 0.00            |
|                                                           | H    | 88    | -0.03    | -2.28 | -0.07         | 0.04          | -0.06           | -0.01           | 0.00            | 0.03            | 0.01            | 0.00            |

**Table S9.** Octahedral distortion parameters ( $\beta$  and  $\Delta\beta$ ) for 2D (S)-o-BrMBAPbI<sub>3</sub><sup>\*</sup>, (S)-m-BrMBA<sub>2</sub>PbI<sub>4</sub> and (S)-p-BrMBA<sub>2</sub>PbI<sub>4</sub>.

| Material                                  | $\beta$ (°)                                      | $\Delta\beta$ (°) |
|-------------------------------------------|--------------------------------------------------|-------------------|
| (S)-m-BrMBA <sub>2</sub> PbI <sub>4</sub> | 138.63, 152.69                                   | 14.06             |
| (S)-p-BrMBA <sub>2</sub> PbI <sub>4</sub> | 145.76, 151.20, 156.41<br>146.00, 152.33, 153.74 | 10.65             |

The  $\beta$  angle (Pb–I–Pb bond angle) disparity ( $\Delta\beta$ )<sup>2</sup> are calculated by following equations:

$$\Delta\beta = \beta_{max} - \beta_{min}$$

\*In 1D (S)-o-BrMBAPbI<sub>3</sub>, the adjacent PbI<sub>6</sub> octahedra are connected via three coplanar I atoms, and therefore neither the  $\beta$  angle nor  $\Delta\beta$  is defined.

**Table S10.** Crystal structure data for the samples investigated in the present paper. Data for (S)-m-BrMBA<sub>2</sub>PbI<sub>4</sub> have been taken from reference<sup>1</sup>.

|                               | (S)-o-BrMBAPbI <sub>3</sub> | (S)-m-BrMBA <sub>2</sub> PbI <sub>4</sub> | (S)-p-BrMBA <sub>2</sub> PbI <sub>4</sub> |
|-------------------------------|-----------------------------|-------------------------------------------|-------------------------------------------|
| Formula weight                | 787.97                      | 1116.96                                   | 1116.96                                   |
| Wavelength (Å)                | 0.71073                     | 0.71073                                   | 0.71073                                   |
| Crystal system                | Monoclinic                  | Monoclinic                                | Monoclinic                                |
| Space group                   | <i>P2</i> <sub>1</sub>      | <i>P2</i> <sub>1</sub>                    | <i>C2</i>                                 |
| Lattice parameters (Å)        | <i>a</i> = 8.6940 (11)      | <i>a</i> = 9.1551 (5)                     | <i>a</i> = 12.7224 (14)                   |
|                               | <i>b</i> = 8.0422 (10)      | <i>b</i> = 8.2245 (5)                     | <i>b</i> = 12.7678 (14)                   |
|                               | <i>c</i> = 11.5683 (16)     | <i>c</i> = 17.7782 (10)                   | <i>c</i> = 32.749 (4)                     |
|                               | <i>β</i> = 99.985 (5)       | <i>β</i> = 99.051 (3)                     | <i>β</i> = 93.919 (5)                     |
| Cell Volume (Å <sup>3</sup> ) | 796.59 (18)                 | 1321.96 (13)                              | 5307.1 (11)                               |
| Z                             | 2                           | 2                                         | 8                                         |
| CCDC code                     | 2501013                     | 2222721                                   | 2479653                                   |

Figures S1-S9

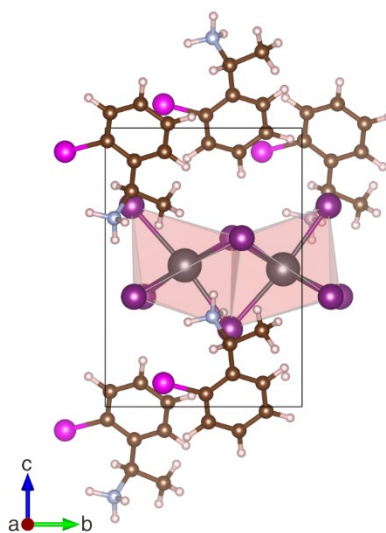

Figure S1. Crystal structures of (R)-o-BrMBAPbI<sub>3</sub>-theory.

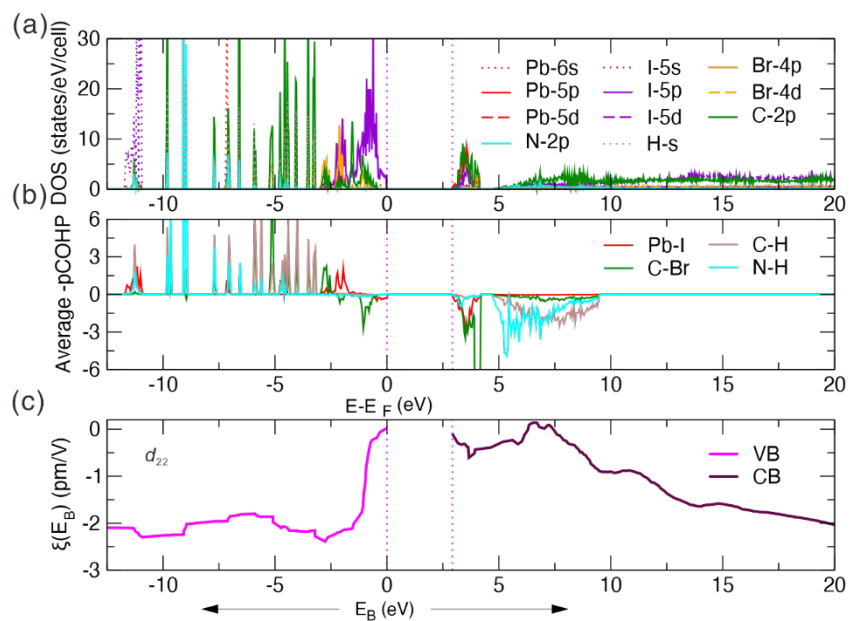

**Figure S2.** (a) PDOS (b) COHP analysis describing the average chemical bonding, and (c)  $\zeta(E_B)$ -vs- $E_B$  plot for the largest SHG component  $d_{22}$  of (R)-o-BrMBAPbI<sub>3</sub>-theory.

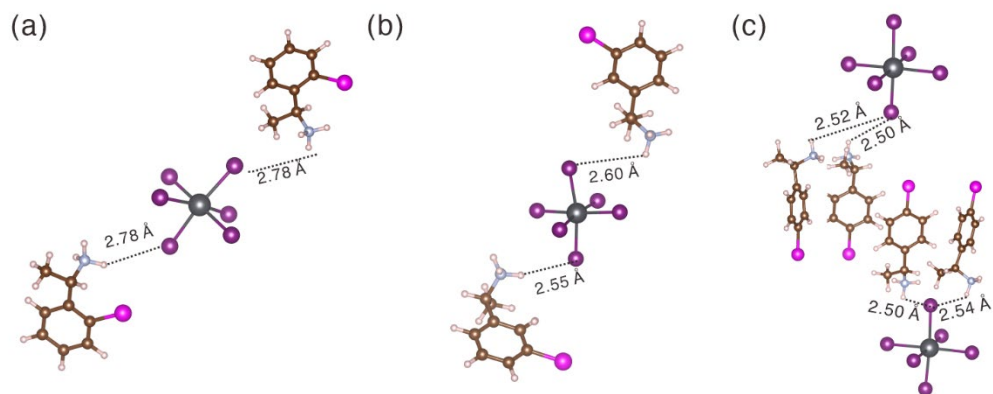

**Figure S3.** Coordination environments of the  $\text{PbI}_6$  octahedra and  $\text{I}\cdots\text{NH}$  weak interactions in (a) (S)-o-BrMBAPbI<sub>3</sub>, (b) (S)-m-BrMBA<sub>2</sub>PbI<sub>4</sub>, and (c) (S)-p-BrMBA<sub>2</sub>PbI<sub>4</sub>.

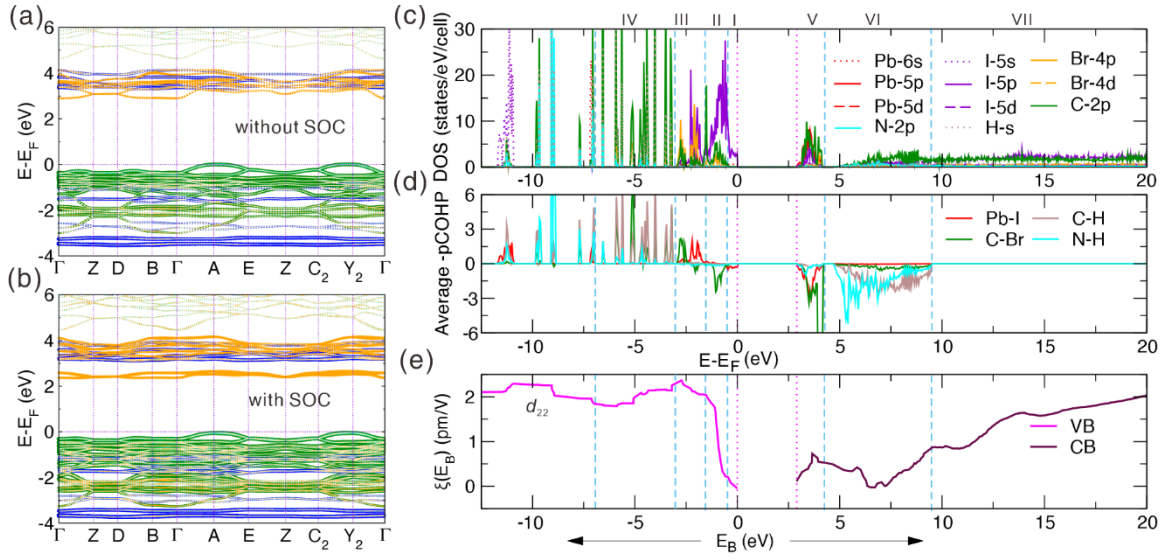

**Figure S4.** Electronic structures of (S)-o-BrMBAPbI<sub>3</sub>. (a) Band structure without SOC and (b) with SOC. High-symmetry points:  $\Gamma = (0, 0, 0)$ , Z = (0, 0.5, 0), D = (0, 0.5, 0.5), B = (0, 0, 0.5), A = (-0.5, 0, 0.5), E = (-0.5, 0.5, 0.5), C<sub>2</sub> = (-0.5, 0.5, 0), and Y<sub>2</sub> = (-0.5, 0, 0). Key: green = I 5p; orange = Pb 6p; blue = C 2p, cyan = Pb 6s. (c) Calculated PDOS. (d) COHP analysis describing the average chemical bonding characteristics. (e) PRF analysis for the largest SHG tensor component  $d_{22}$  of (S)-o-BrMBAPbI<sub>3</sub>.

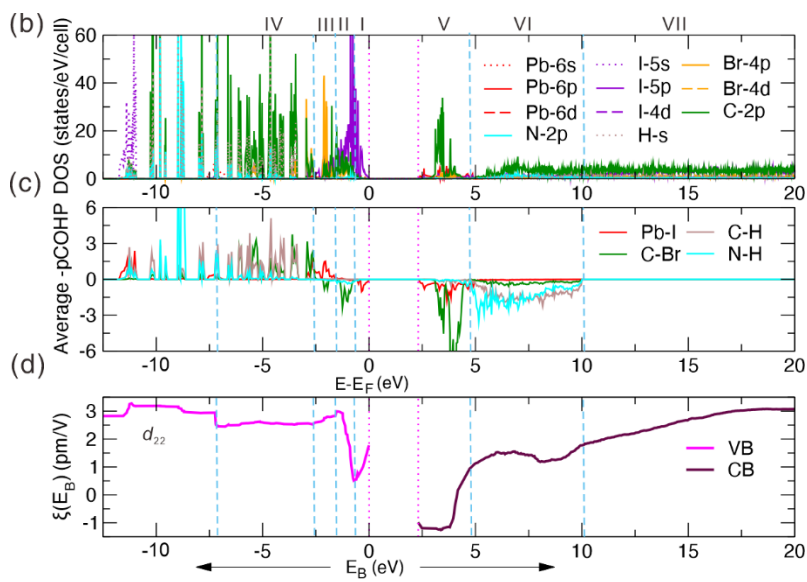

**Figure S5.** (a) Calculated PDOS. (b) COHP analysis describing the average chemical bonding characteristics. (c) PRF analysis for the largest SHG tensor component  $d_{22}$  of (S)-m-BrMBA<sub>2</sub>PbI<sub>4</sub>.

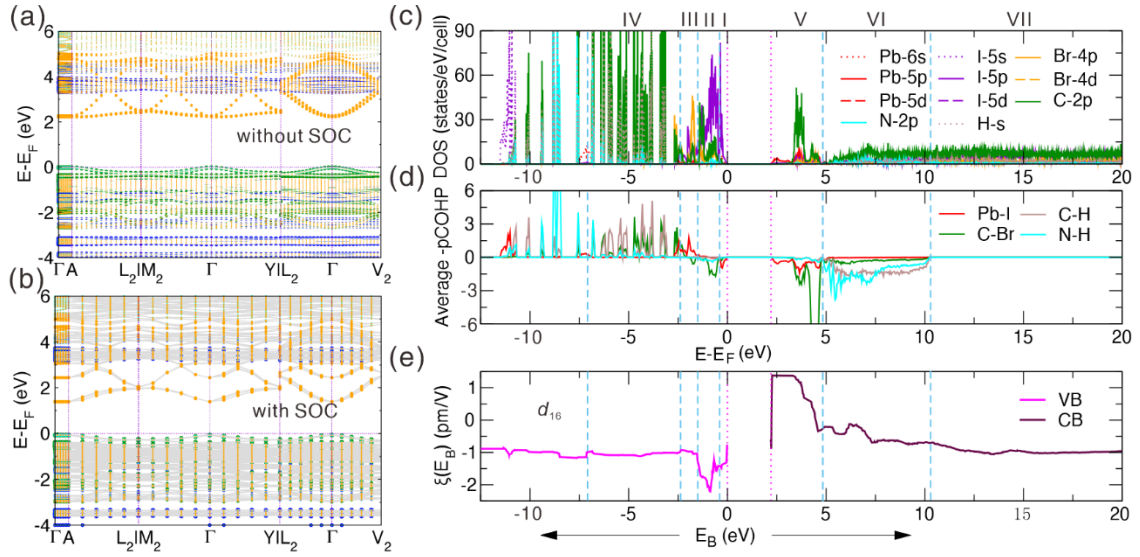

**Figure S6.** Band structures of (S)-p-BrMBA<sub>2</sub>PbI<sub>4</sub>: (a) without SOC and (b) with SOC.  $\Gamma = (0, 0, 0)$ ,  $A = (0, 0, 0.5)$ ,  $I_2 = (0.495, 0.495, 0.5)$ ,  $I = (-0.495, 0.504, 0.5)$ ,  $M_2 = (-0.5, 0.5, 0.5)$ ,  $Y = (0.5, 0.5, 0)$ ,  $L_2 = (0, 0.5, 0.5)$ , and  $V_2 = (0, 0.5, 0)$ . Key: green = I 5p; orange = Pb 6p; blue = C 2p, cyan = Pb 6s. (c) Calculated PDOS. (d) COHP analysis describing the average chemical bonding characteristics. (e) PRF for the largest SHG component  $d_{16}$  of (S)-p-BrMBA<sub>2</sub>PbI<sub>4</sub>.

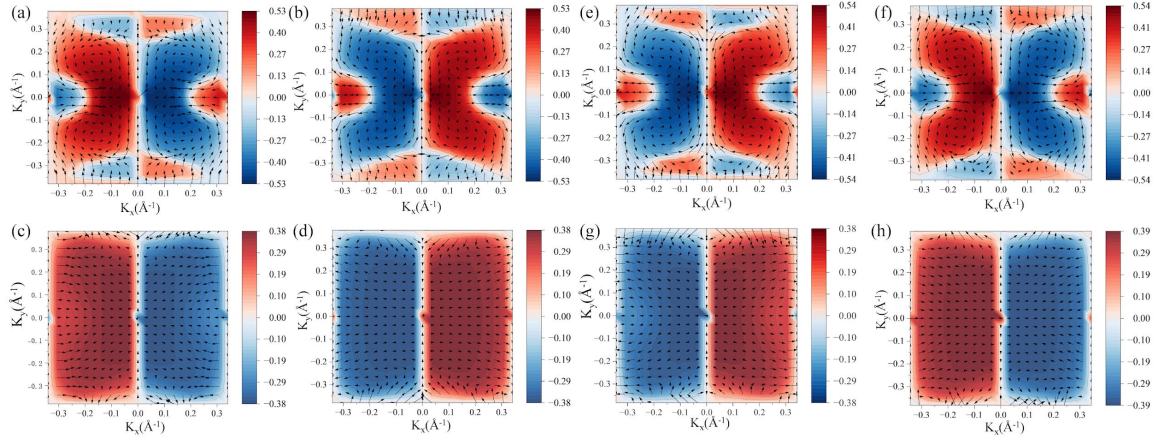

**Figure S7.** Spin texture of the valence and conduction band branches for (R/S)-m-BrMBA<sub>2</sub>PbI<sub>4</sub>. (a-d) (R)-m-BrMBA<sub>2</sub>PbI<sub>4</sub>: (a) outer and (b) inner VBM, (c) outer and (d) inner CBM; (e-h) (S)-m-BrMBA<sub>2</sub>PbI<sub>4</sub>: (e) outer and (f) inner VBM, (g) outer and (h) inner CBM. The red and blue indicate positive and negative  $S_z$  components, respectively.

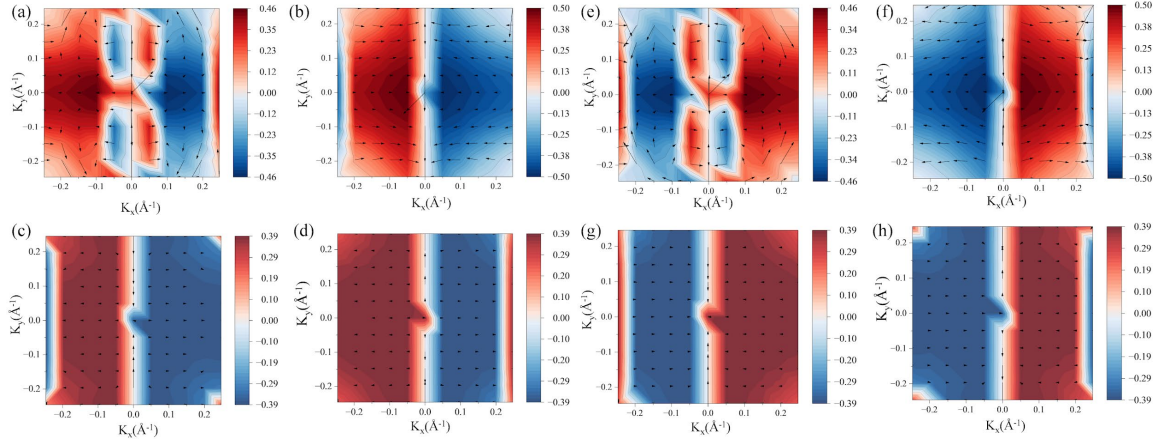

**Figure S8.** Spin texture of the valence and conduction band branches for (R/S)-p-BrMBA<sub>2</sub>PbI<sub>4</sub>. (a-d) (R)-p-BrMBA<sub>2</sub>PbI<sub>4</sub>: (a) outer and (b) inner VBM, (c) outer and (d) inner CBM; (e-h) (S)-p-BrMBA<sub>2</sub>PbI<sub>4</sub>: (e) outer and (f) inner VBM, (g) outer and (h) inner CBM. The red and blue indicate positive and negative  $S_z$  components, respectively.

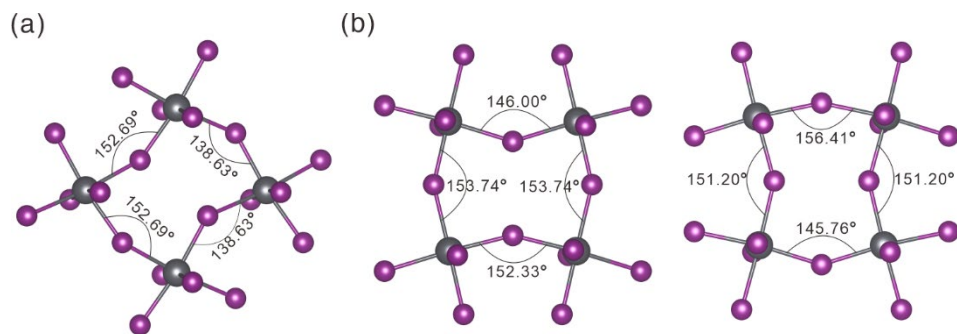

**Figure S9.** In-plane views of chiral OIHM perovskite layers with  $\beta$  angles (Pb–I–Pb bond angles) for (d) (S)-m-BrMBA<sub>2</sub>PbI<sub>4</sub> and (e) (S)-p-BrMBA<sub>2</sub>PbI<sub>4</sub>

## References

- (1) Liu, S. et al. Bright circularly polarized photoluminescence in chiral layered hybrid lead-halide perovskites. *Sci. Adv.* **9**, eadh5083 (2023).
- (2) Jana, M. K. et al. Structural descriptor for enhanced spin-splitting in 2D hybrid perovskites. *Nat. Commun.* **12**, 4982 (2021).
